# Supplementary material
Source: PubMed Central journal article supplement (PMC2311375)
Supplement: 0802190105_Supplemental_PDF.pdf [file 0802190105_Supplemental_PDF.pdf]

# Supporting Information

Geertsma *et al.* 10.1073/pnas.0802190105

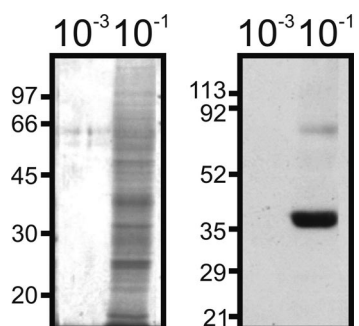

**Fig. S1.** Insoluble inclusion bodies isolated from cells expressing LacS to different levels. Expression of LacS by *Escherichia coli* MC1061 cells was induced with the percentages of L-arabinose indicated above the panels. Molecular masses (in kDa) and positions of the marker proteins are indicated on the left of each panel. (*Left*) Coomassie-stained gel. (*Right*) Immunoblot decorated with anti-His tag antibody.



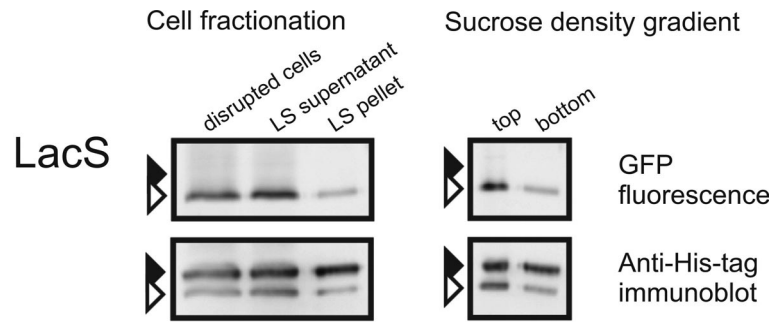

**Fig. S3.** Isolation of membrane vesicles. *E. coli* MC1061 cells were induced with  $1 \times 10^{-1}\%$  (wt/vol) L-arabinose for 4 h at 25°C to allow expression of LacS. Cells were disrupted by two passes through a French pressure cell. (*Left*) The disrupted cells before centrifugation and the supernatant (LS supernatant) and pellet (LS pellet) after fractionation by low-speed centrifugation were analyzed. (*Right*) The supernatant of the low-speed centrifugation was further fractionated by sucrose density centrifugation. The top (low density; 5 ml) and bottom (high density; 1 ml) fractions of the sucrose gradient were analyzed.

**Table S1. Proteins analyzed in this study**

| Protein             | Function                                   | Source organism        | Transporter family | Family nr. | Size, kDa |
|---------------------|--------------------------------------------|------------------------|--------------------|------------|-----------|
| LacY                | Lactose/H <sup>+</sup> symporter           | <i>E. coli</i>         | MFS                | 2.A.1      | 46.5      |
| GltP                | Glutamate/H <sup>+</sup> symporter         | <i>E. coli</i>         | DAACS              | 2.A.23     | 47.2      |
| EcCIC               | Cl <sup>-</sup> /H <sup>+</sup> antiporter | <i>E. coli</i>         | CIC                | 2.A.49     | 50.3      |
| NhaA                | Na <sup>+</sup> /H <sup>+</sup> antiporter | <i>E. coli</i>         | NhaA               | 2.A.33     | 41.4      |
| DctA                | Dicarboxylate/H <sup>+</sup> symporter     | <i>E. coli</i>         | DAACS              | 2.A.23     | 45.4      |
| LacS( $\Delta$ IIA) | Lactose/H <sup>+</sup> symporter           | <i>S. thermophilus</i> | GPH (MFS)          | 2.A.2      | 52.3      |
| YdjN                | Unknown                                    | <i>E. coli</i>         | DAACS              | 2.A.23     | 48.7      |
| SstT                | Serine/Na <sup>+</sup> symporter           | <i>E. coli</i>         | DAACS              | 2.A.23     | 43.5      |
| GlpF                | Glycerol facilitator                       | <i>E. coli</i>         | MIP                | 1.A.8      | 29.8      |

MFS, Major Facilitator Superfamily; DAACS, Dicarboxylate/Amino Acid:Cation (Na<sup>+</sup> or H<sup>+</sup>) Symporter Family; CIC, Chloride Carrier/Channel Family; NhaA, Na<sup>+</sup>:H<sup>+</sup> Antiporter (NhaA) Family; GPH, Glycoside-Pentoside-Hexuronide:Cation Symporter Family; MIP, Major Intrinsic Protein Family. Family names and numbers are derived from the Transport Classification Database [Saier MH, Jr (1988) Molecular phylogeny as a basis for the classification of transport proteins from bacteria, archaea, and eukarya. *Adv Micro Physiol* 40:81–136].
